# Supplementary material for: Modulatory Communication Signal Performance Is Associated with a Distinct Neurogenomic State in Honey Bees
Source: PLoS One. 2009 Aug 20;4(8):e6694. doi: 10.1371/journal.pone.0006694 (PMC2725773; doi:10.1371/journal.pone.0006694)
Supplement: Table S1 — List of genes differentially expressed in the brains of V+ and V− bees. Corresponding Drosophila and Human orthologs and log2 (V+/V− ratio) expression values are shown. Genes differentially regulated in V+ and V− bees and also up- or downregulated by one or more pheromone are indicated. (0.14 MB XLS) [file pone.0006694.s001.xls]

## Sheet: TableS1
Table S1: List of genes differentially expressed in the brains of V+ and V- bees.
Corresponding Drosophila and Human orthologs and log2 (V+/V- ratio) expression values are shown.
Genes differentially regulated in V+ and V- bees and also up- or downregulated by one or more pheromone are indicated.
V+ < V-
Honey bee genes	Fly orthologs	Human orthologs	Expression values	Alarm pheromone	Queen mandibular pheromone	Brood pheromone
AM00017	FBgn0033159	ENSG00000171587	-0.138197
AM00049R			-0.0574922
AM00202			-0.197117
AM00203			-0.312444
AM00224			-0.239488
AM00232			-0.139871
AM00328	FBgn0037069		-0.779032
AM00342	FBgn0039481		-0.179544
AM00344			-0.21089
AM00362	FBgn0013953		-0.22712
AM00383			-0.175001
AM00417R			-0.357266
AM00446			-0.199246
AM00515R			-0.0832656
AM00547R			-0.134118
AM00577			-0.109528
AM00632			-0.573782
AM00653R			-0.140355
AM00731R			-0.102888
AM00753			-0.113485
AM00769R			-0.0991869
AM00803			-0.442015
AM00842			-0.14817
AM00864			-0.0987103
AM00875			-0.101332
AM00940			-0.689993
AM01027			-0.108285
AM01039			-0.148481
AM01053			-0.135524
AM01063			-0.0615775			down
AM01073			-0.134118
AM01074			-0.136981		down
AM01111			-0.0637565
AM01120			-0.148332
AM01177			-0.114783
AM01178			-0.114809	up
AM01180			-0.265091
AM01197			-0.0995841			up
AM01205			-0.219747
AM01217			-0.0908381		up
AM01227			-0.238322		up	down
AM01241			-0.075739
AM01246			-0.385713
AM01247			-0.0744623
AM01300			-0.0564824
AM01319			-0.103695
AM01329			-0.210504
AM01335			-0.204369
AM01354			-0.103656
AM01368			-0.291937
AM01370			-0.133466
AM01412			-0.243487
AM01414			-0.0655148
AM01476			-0.191568
AM01490		ENSG00000156299	-0.0893191
AM01525			-0.0965085
AM01531			-0.144358
AM01542			-0.140425
AM01568			-0.0831528
AM01577			-0.220622
AM01581			-0.0507033
AM01620	FBgn0011582		-0.121414
AM01665			-0.160689
AM01699			-0.15115
AM01702			-0.0684098
AM01715			-0.123692
AM01717			-0.355818
AM01725			-0.155879
AM01740			-0.0904168
AM01745			-0.110997
AM01753			-0.0959298
AM01758			-0.211589	down
AM01826	FBgn0013948		-0.0744617
AM01851			-0.170176
AM01865			-0.0966049
AM01876			-0.107314
AM01885			-0.124402
AM01897			-0.128046			up
AM01907			-0.135233
AM01915			-0.0951831
AM01979			-0.143921
AM01987			-0.0958275
AM01998			-0.103846		up
AM02035			-0.125099
AM02142			-0.106316
AM02150			-0.231153	up
AM02152			-0.124009	down
AM02176			-0.115041
AM02210			-0.128684
AM02241			-0.14951
AM02255			-0.0767072
AM02285			-0.279644			up
AM02299			-0.101955
AM02336			-0.128189	up
AM02356			-0.067467
AM02377			-0.0618592
AM02379			-0.0804842
AM02396			-0.186469
AM02421			-0.188554
AM02425			-0.115586
AM02446			-0.13509
AM02497			-0.15106
AM02502			-0.371721
AM02507			-0.113814
AM02526			-0.215676			up
AM02532			-0.0798488
AM02540			-0.280986
AM02541			-0.106774
AM02548			-0.117486
AM02574			-0.103037
AM02575			-0.135482
AM02586			-0.06266
AM02602			-0.14781
AM02641	FBgn0035155		-0.107153	down
AM02646	FBgn0028433		-0.322135
AM02647	FBgn0020907		-0.0726301
AM02677		ENSG00000187720	-0.0774094
AM02722	FBgn0005593	ENSG00000137970	-0.207322
AM02744	FBgn0031059		-0.0820352
AM02843	FBgn0036488	ENSG00000125995	-0.0800164
AM02880	FBgn0034877	ENSG00000111775	-0.120412
AM02896	FBgn0035917		-0.179054
AM02907	FBgn0003721	ENSG00000143549	-0.232585
AM02914	FBgn0047038		-0.152673
AM02933	FBgn0005619	ENSG00000140287	-0.601535
AM02940		ENSG00000101443	-0.281806			down
AM02964			-0.107674
AM02974	FBgn0011227		-0.244778
AM02983	FBgn0034138	ENSG00000115268	-0.110136
AM03072			-0.103117
AM03086			-0.118593	down
AM03101	FBgn0031505		-0.0948493
AM03141	FBgn0003884	ENSG00000127824	-0.10839
AM03143	FBgn0032021		-0.195973		up
AM03144	FBgn0028841		-0.553169
AM03182	FBgn0037434	ENSG00000125743	-0.116282	down
AM03221			-0.0806594
AM03273		ENSG00000137807	-0.275263
AM03280			-0.0548542
AM03295	FBgn0034743	ENSG00000187928	-0.150343			down
AM03342	FBgn0002789		-0.736015
AM03403			-0.0676421
AM03407	FBgn0034626	ENSG00000162604	-0.146184		up
AM03412	FBgn0067102	ENSG00000148154	-0.117105
AM03423			-0.270794
AM03463	FBgn0031772		-0.133875
AM03484	FBgn0039669		-0.0948215
AM03493			-0.0687989
AM03535			-0.0920406
AM03538	FBgn0005533	ENSG00000184779	-0.171245
AM03559	FBgn0039301	ENSG00000075188	-0.138016
AM03597	FBgn0020300		-0.205011
AM03599	FBgn0034118	ENSG00000198088	-0.110463
AM03686			-0.107434
AM03694	FBgn0025802	ENSG00000133812	-0.145142
AM03700	FBgn0020618	ENSG00000204628	-0.133777
AM03730	FBgn0029133	ENSG00000131467	-0.117188
AM03749			-0.130594
AM03769	FBgn0035228	ENSG00000196850	-0.0607775
AM03774	FBgn0039576	ENSG00000156467	-0.151295
AM03846	FBgn0053803	ENSG00000112727	-0.173164	up
AM03875			-0.115057
AM03921	FBgn0032213		-0.274436
AM03922	FBgn0002607	ENSG00000108298	-0.105127
AM03923			-0.0850916
AM03994	FBgn0002936	ENSG00000166794	-0.259762
AM03995	FBgn0000318	ENSG00000129235	-0.0834862	down
AM04019	FBgn0016726	ENSG00000132355	-0.103167
AM04053	FBgn0026562	ENSG00000113140	-0.198644		up
AM04077		ENSG00000143162	-0.152186
AM04235	FBgn0034688	ENSG00000146476	-0.137143
AM04280	FBgn0000313		-0.200517
AM04309	FBgn0011300		-0.143792
AM04316	FBgn0040751	ENSG00000183513	-0.114595
AM04327			-0.126847
AM04330	FBgn0025638	ENSG00000100387	-0.101974	down
AM04356	FBgn0083949		-0.157744
AM04431			-0.45595
AM04472	FBgn0010113	ENSG00000112406	-0.13642
AM04481	FBgn0032400		-0.0960801
AM04489	FBgn0035398	ENSG00000134216	-0.204145
AM04674			-0.164494	down
AM04707	FBgn0038224		-0.143279
AM04761	FBgn0010411	ENSG00000096150	-0.115044
AM04772			-0.120489
AM04785	FBgn0050354	ENSG00000173660	-0.171315	down
AM04825	FBgn0025682	ENSG00000128595	-0.107853
AM04827	FBgn0003731	ENSG00000065361	-0.181388
AM04850	FBgn0002593	ENSG00000137818	-0.141443
AM04859	FBgn0038294		-0.11854
AM04889	FBgn0027086	ENSG00000196305	-0.194342
AM04897	FBgn0051006		-0.542148
AM04903	FBgn0015745	ENSG00000156482	-0.107358
AM04909	FBgn0037976		-0.195303
AM04935	FBgn0038235	ENSG00000124541	-0.178024
AM04962	FBgn0031164	ENSG00000134375	-0.114518
AM04979	FBgn0032518	ENSG00000114391	-0.157341
AM04989	FBgn0025814	ENSG00000008394	-0.14282
AM05058	FBgn0037328	ENSG00000182899	-0.2186
AM05069	FBgn0053527		-0.149201			down
AM05125	FBgn0026372	ENSG00000129973	-0.104502
AM05169	FBgn0004449	ENSG00000009694	-0.122466
AM05259	FBgn0030964		-0.13677
AM05264	FBgn0000108	ENSG00000142192	-0.131011
AM05277	FBgn0004623		-0.604955
AM05285	FBgn0035010		-0.12257
AM05286	FBgn0037302	ENSG00000171160	-0.696766
AM05288	FBgn0033901	ENSG00000101346	-0.0864125
AM05306	FBgn0004413	ENSG00000196656	-0.148774
AM05321	FBgn0025608	ENSG00000113194	-0.133427
AM05345	FBgn0039347		-0.0929888
AM05364	FBgn0062447		-0.11988
AM05381	FBgn0000121		-0.418978	up
AM05464	FBgn0036353	ENSG00000139291	-0.192463
AM05488	FBgn0037873	ENSG00000143252	-0.214545
AM05544	FBgn0034909		-0.179606		down
AM05545	FBgn0053041		-0.124461
AM05560	FBgn0014857	ENSG00000132475	-0.127771
AM05659		ENSG00000101162	-0.117913
AM05686	FBgn0035473		-0.152669
AM05809	FBgn0005614	ENSG00000072315	-0.232395
AM05837	FBgn0083919	ENSG00000122367	-0.177988
AM05839	FBgn0032884	ENSG00000132963	-0.0740658	down
AM05844	FBgn0031913		-0.248761
AM05891	FBgn0003062	ENSG00000105202	-0.0816714
AM05900	FBgn0036715		-0.301059		down
AM05924			-0.159538	down
AM05929			-0.0673511	down		down
AM05963	FBgn0034660	ENSG00000134013	-0.309783
AM05974	FBgn0029067	ENSG00000175826	-0.0681876		down
AM05978	FBgn0037637	ENSG00000136003	-0.0857206
AM06074	FBgn0022770		-0.0924647
AM06092	FBgn0050371		-0.174784
AM06095	FBgn0014019		-0.208354
AM06130	FBgn0013954	ENSG00000119782	-0.0857891
AM06134	FBgn0028622		-0.142856
AM06140	FBgn0025455	ENSG00000129315	-0.0947798
AM06194	FBgn0013348		-0.743212
AM06241	FBgn0030106		-0.700569		up
AM06290	FBgn0030136		-0.168285
AM06310	FBgn0033936	ENSG00000166173	-0.511618
AM06329	FBgn0036825	ENSG00000037241	-0.110681
AM06332	FBgn0003082		-0.11699
AM06339	FBgn0039713	ENSG00000142937	-0.164357
AM06387	FBgn0013678		-0.185927
AM06412	FBgn0027562		-0.155454
AM06501R			-0.0946289	up
AM06608	FBgn0035968	ENSG00000164175	-0.262478			up
AM06649	FBgn0040890	ENSG00000174695	-0.0777299
AM06691	FBgn0010412	ENSG00000105372	-0.163197
AM06714	FBgn0039406	ENSG00000109475	-0.171315
AM06721	FBgn0038976	ENSG00000123349	-0.172022
AM06757		ENSG00000113578	-0.119947
AM06766			-0.272548	up	down	up
AM06799			-0.120661			down
AM06804	FBgn0036334	ENSG00000115541	-0.173343	up
AM06869	FBgn0003175		-0.0851496
AM06885	FBgn0039771		-0.340045
AM06889	FBgn0082598	ENSG00000135334	-0.197276		up
AM06914			-0.1089		up
AM06921	FBgn0019644	ENSG00000116459	-0.172651
AM06927			-0.0539519
AM06928	FBgn0030821		-0.0930197	down
AM06946	FBgn0050392		-0.124716
AM06994			-0.158422
AM06995	FBgn0040007	ENSG00000172809	-0.134871
AM07001	FBgn0083979		-0.171103
AM07034	FBgn0033906	ENSG00000129625	-0.162867	down
AM07082	FBgn0040871		-0.182394
AM07103	FBgn0013467		-0.163086
AM07150	FBgn0039835	ENSG00000106591	-0.119223
AM07185	FBgn0052016	ENSG00000184708	-0.18638
AM07189	FBgn0033917		-0.0816043
AM07201			-0.0634615
AM07305	FBgn0036838	ENSG00000099899	-0.11917
AM07373	FBgn0030572	ENSG00000131368	-0.0872007
AM07421		ENSG00000106266	-0.114113
AM07427	FBgn0014028	ENSG00000117118	-0.123164
AM07528	FBgn0027360	ENSG00000134809	-0.116693
AM07531	FBgn0036381		-0.0553316	down		down
AM07532	FBgn0036135	ENSG00000112651	-0.126383
AM07552	FBgn0039172	ENSG00000129128	-0.119466
AM07577	FBgn0052672	ENSG00000170296	-0.0811766		up
AM07609			-0.203095
AM07635	FBgn0032453		-0.151157
AM07693	FBgn0011361	ENSG00000004779	-0.186167
AM07697			-0.490359		up
AM07731			-0.163527		up
AM07733	FBgn0031980	ENSG00000165502	-0.101594
AM07768	FBgn0039801		-0.291269	down
AM07787	FBgn0026076	ENSG00000122042	-0.126159
AM07791	FBgn0039802	ENSG00000116288	-0.0905351	down
AM07792	FBgn0035510		-0.221663
AM07824			-0.254996		up
AM07832	FBgn0032599	ENSG00000130332	-0.139579			down
AM07850	FBgn0020910	ENSG00000140986	-0.0800443
AM07889	FBgn0037913	ENSG00000121769	-0.293042		up
AM07891			-0.0950335
AM07932	FBgn0000464	ENSG00000105426	-0.080316		up
AM07946	FBgn0040913		-0.14387
AM07975	FBgn0001280		-0.162277		up
AM07989	FBgn0032759	ENSG00000067596	-0.258024
AM07994	FBgn0032799	ENSG00000000419	-0.226862
AM07998		ENSG00000164120	-0.12284
AM08024	FBgn0033837	ENSG00000143515	-0.133766
AM08030	FBgn0031035	ENSG00000124614	-0.11896			down
AM08071	FBgn0037847	ENSG00000148450	-0.164445
AM08072			-0.16497
AM08079			-0.123118
AM08083	FBgn0039114		-0.441765	down	up
AM08088	FBgn0003279	ENSG00000174444	-0.137269			down
AM08091		ENSG00000108272	-0.303969
AM08093	FBgn0041164	ENSG00000073146	-0.0639834
AM08114	FBgn0038596		-0.101639			down
AM08116	FBgn0000117	ENSG00000173801	-0.088307
AM08166	FBgn0020238	ENSG00000108953	-0.176712
AM08197	FBgn0031049	ENSG00000132432	-0.170167
AM08213	FBgn0016691	ENSG00000159186	-0.231889
AM08217	FBgn0000253	ENSG00000143933	-0.13532
AM08218		ENSG00000198461	-0.134416
AM08232	FBgn0015756	ENSG00000185078	-0.162079
AM08245		ENSG00000108272	-0.309793		up
AM08275	FBgn0010265	ENSG00000110700	-0.206341
AM08291	FBgn0026749	ENSG00000119801	-0.152172
AM08294	FBgn0026141		-0.0947225
AM08382		ENSG00000185262	-0.12642		up
AM08398	FBgn0019624	ENSG00000178741	-0.147516
AM08437	FBgn0040070	ENSG00000136810	-0.0896176	down
AM08572			-0.124103
AM08619			-0.0920454
AM08623	FBgn0026208	ENSG00000107223	-0.117503	up
AM08628	FBgn0061492		-0.160695
AM08715	FBgn0053639		-0.198557
AM08730	FBgn0034821	ENSG00000167157	-0.0979118
AM08759	FBgn0032987	ENSG00000122026	-0.0794965
AM08784	FBgn0038532	ENSG00000103994	-0.326435
AM08792	FBgn0002772		-0.488878
AM08806			-0.174974
AM08835		ENSG00000136874	-0.117209
AM08844	FBgn0003861	ENSG00000072315	-0.631271
AM08859			-0.163092
AM08861	FBgn0010602	ENSG00000103275	-0.171143
AM08868	FBgn0034311		-0.148622			up
AM08877			-1.16272
AM08915	FBgn0016685		-0.120285
AM08934	FBgn0033624		-0.150771	down
AM08991	FBgn0037874	ENSG00000133112	-0.130075
AM09039	FBgn0033983	ENSG00000018510	-0.338133
AM09043	FBgn0038587	ENSG00000146701	-0.0667038
AM09052	FBgn0013325	ENSG00000142676	-0.151639
AM09064	FBgn0016120	ENSG00000167863	-0.163376
AM09095			-0.136131
AM09119	FBgn0038984	ENSG00000006831	-0.0707444
AM09128			-0.311239
AM09129	FBgn0029854		-0.116165
AM09132		ENSG00000105648	-0.507197
AM09209			-0.125401			down
AM09228		ENSG00000083123	-0.361898
AM09273	FBgn0038842		-0.0847634		down
AM09279			-0.308722
AM09291	FBgn0052085	ENSG00000127585	-0.0923004
AM09316	FBgn0030183	ENSG00000175155	-0.105515	up
AM09329	FBgn0010612	ENSG00000167283	-0.0960811
AM09340	FBgn0037940		-0.168603
AM09355	FBgn0040726		-0.157597
AM09466	FBgn0032132		-0.331916
AM09491	FBgn0017579	ENSG00000188846	-0.133554
AM09493	FBgn0034091	ENSG00000105993	-0.115388
AM09529		ENSG00000174766	-0.147607
AM09582	FBgn0035323		-0.101773	down
AM09644			-0.236368		up
AM09671	FBgn0036667	ENSG00000134825	-0.0827105
AM09693	FBgn0032202	ENSG00000111269	-0.178494
AM09790	FBgn0052647		-0.104176		down
AM09810	FBgn0051800	ENSG00000164008	-0.0984698	down
AM09821	FBgn0035756	ENSG00000007516	-0.0643053
AM09826	FBgn0000150	ENSG00000011052	-0.150407
AM09830	FBgn0028342	ENSG00000099624	-0.174323
AM09922			-0.121093			up
AM09929			-0.106902
AM09942	FBgn0001257		-0.103353			down
AM09953	FBgn0014163		-0.231507
AM10049	FBgn0033635	ENSG00000106125	-0.132801
AM10059	FBgn0019936	ENSG00000008988	-0.11527
AM10070	FBgn0003360	ENSG00000005022	-0.0746943
AM10074	FBgn0035334	ENSG00000100348	-0.0896272
AM10100	FBgn0035372		-0.15118
AM10111	FBgn0015582	ENSG00000161513	-0.170153
AM10128	FBgn0036672	ENSG00000115641	-0.324588
AM10186	FBgn0000711	ENSG00000163806	-0.106678
AM10207			-0.115657
AM10242	FBgn0010413	ENSG00000118181	-0.157955
AM10267			-0.129447			down
AM10293	FBgn0037435	ENSG00000122435	-0.151348
AM10294	FBgn0027658	ENSG00000130348	-0.126388
AM10325	FBgn0051100		-0.23645
AM10364			-0.163873
AM10490	FBgn0027111		-0.220891
AM10545	FBgn0003091	ENSG00000126583	-0.197327
AM10555	FBgn0052372		-0.0943378
AM10578	FBgn0023506	ENSG00000100056	-0.509954		up
AM10601	FBgn0031066	ENSG00000126267	-0.203007	down
AM10620			-0.221242
AM10626	FBgn0054039	ENSG00000140365	-0.108012
AM10677	FBgn0010426	ENSG00000128524	-0.0952636
AM10678	FBgn0003941	ENSG00000196084	-0.156554
AM10690	FBgn0034355	ENSG00000072041	-0.0871811
AM10732	FBgn0000410		-0.111169
AM10739	FBgn0003249		-0.719817
AM10750			-0.112556	down
AM10783	FBgn0029888	ENSG00000166136	-0.100843
AM10913	FBgn0015351	ENSG00000101574	-0.262146
AM10931			-0.0601173		up
AM10967	FBgn0031459	ENSG00000169567	-0.0946927
AM11027	FBgn0036078		-0.221473
AM11039	FBgn0015374	ENSG00000184787	-0.16033
AM11041	FBgn0030252	ENSG00000091536	-0.158441
AM11067		ENSG00000106537	-0.117656		down
AM11133	FBgn0035854	ENSG00000095059	-0.122434
AM11166	FBgn0058127		-0.0930201
AM11185			-0.0984049
AM11200	FBgn0036581	ENSG00000133398	-0.105918	down
AM11225	FBgn0036516	ENSG00000099804	-0.0912059
AM11236			-0.23486
AM11265	FBgn0024188	ENSG00000121579	-0.105826
AM11313	FBgn0037262	ENSG00000108590	-0.144359	down
AM11320	FBgn0030968	ENSG00000169738	-0.185407
AM11359	FBgn0035252	ENSG00000176876	-0.145648
AM11369			-0.0804246
AM11377	FBgn0011695		-0.560093
AM11416	FBgn0034049		-0.617819
AM11430			-0.458674
AM11431	FBgn0062442	ENSG00000145354	-0.232843	down
AM11463	FBgn0037094	ENSG00000162923	-0.454723
AM11474	FBgn0011726		-0.100832
AM11487	FBgn0003349	ENSG00000072415	-0.106036
AM11510		ENSG00000180573	-0.193286
AM11511		ENSG00000167468	-0.0512888
AM11518	FBgn0013342	ENSG00000179036	-0.141917
AM11540	FBgn0032035	ENSG00000129562	-0.214782
AM11560	FBgn0036642	ENSG00000140740	-0.0813043
AM11630	FBgn0038198		-0.278459
AM11743	FBgn0040793		-0.0817471
AM11747	FBgn0035423	ENSG00000114784	-0.153459
AM11778	FBgn0050415		-0.180191
AM11791	FBgn0054036		-0.121224
AM11817			-0.190642
AM11850			-0.0940978
AM11864	FBgn0031145	ENSG00000102898	-0.134548
AM11889	FBgn0003248		-1.28711	up
AM11918	FBgn0029856		-0.0709876		down
AM11932		ENSG00000116030	-0.139284
AM11985	FBgn0037714	ENSG00000143158	-0.0771904
AM11987	FBgn0028696	ENSG00000197756	-0.122909
AM11993	FBgn0010198	ENSG00000134419	-0.264193
AM12007	FBgn0030306	ENSG00000118363	-0.127839
AM12011	FBgn0000064	ENSG00000149925	-0.139531		up
AM12017	FBgn0034968	ENSG00000197958	-0.090397
AM12037	FBgn0052486	ENSG00000204763	-0.18806	up	up
AM12111	FBgn0002775	ENSG00000005302	-0.104795
AM12138	FBgn0051952		-0.275586
AM12158	FBgn0011643	ENSG00000175183	-0.524098
AM12216	FBgn0035880		-0.316908
AM12238			-0.128015
AM12324	FBgn0037314	ENSG00000159377	-0.0783804
AM12334			-0.14326
AM12341	FBgn0028835	ENSG00000198612	-0.0828966
AM12368	FBgn0027950	ENSG00000134046	-0.185937
AM12392	FBgn0051460	ENSG00000163463	-0.122036
AM12394			-0.234775
AM12403	FBgn0038485		-0.0953502
AM12409	FBgn0032433		-0.0671695
AM12549	FBgn0034583		-0.13621
AM12551	FBgn0034186	ENSG00000119041	-0.134354
AM12559	FBgn0032833		-0.183709
AM12561	FBgn0001128	ENSG00000167588	-0.197844
AM12703			-0.136521
AM12716	FBgn0030052		-0.180892
AM12723			-0.457463
AM12727			-0.146383
AM12729	FBgn0023178		-0.181997
AM12774	FBgn0033520		-0.0900548		up
AM12778			-0.325452
AM12803		ENSG00000135577	-0.0627008
AM12813			-0.122327
AM12841R			-0.114421
AM12849R			-0.170532
AM12850			-0.0744749
AM12853	FBgn0036415	ENSG00000108179	-0.130271			down
AM12875			-0.138592
AM12883			-0.149694
V+ > V-
Honey bee genes	Fly orthologs	Human orthologs	Expression values	Alarm pheromone	Queen mandibular pheromone	Brood pheromone
AM00019R			0.0719937	down
AM00021			1.71489
AM00351			1.86544
AM00352			2.14608
AM00353			1.91272
AM00354			2.53123
AM00355			1.85
AM00356			2.03718
AM00357			2.09933
AM00358			2.2022
AM00359			2.33388
AM00360			1.47011			up
AM00361			0.38125			up
AM00398			0.15876
AM00437R			2.54721
AM00459R			0.159277
AM00494			0.121932
AM00495			0.110595
AM00523			0.650746
AM00539			0.263677
AM00556R			0.1138
AM00633			0.197809			up
AM00634			0.217657			up
AM00645			0.243235
AM00692			0.221037
AM00759			0.217386
AM00799			0.0818364	down
AM00870			0.0720935
AM00924R			0.162389
AM00955			0.184984
AM00963R			1.18818
AM01030			0.135273
AM01035			0.132232
AM01085			0.12477
AM01101			0.16775
AM01117			0.315417
AM01146			1.23041
AM01148			0.319582
AM01165			0.0892042
AM01220			0.0877122
AM01228			0.122845
AM01238			0.827728			up
AM01248			0.147937
AM01286			0.139629
AM01304			0.166609
AM01307			0.54639		down
AM01360			0.1706
AM01362			0.169405
AM01421			0.260002
AM01446			0.175446
AM01461			0.169245		down
AM01501			0.08858
AM01518			0.0973807	up	down
AM01554			0.187968		down
AM01559			0.151925
AM01585			0.117379
AM01597			0.191621
AM01628			0.123608
AM01635			0.106231
AM01637			0.177018
AM01641			0.189914
AM01676			0.192207
AM01686			0.152557	up		down
AM01720			0.164445
AM01728			0.0790508
AM01760			0.846055
AM01778			0.13015
AM01834			0.270291
AM01837			0.58954		down
AM01844			0.163237		down	up
AM01954			0.0828281
AM01955			0.140994
AM01959			0.120952
AM01994			0.079368
AM02018			0.0659366
AM02047			0.0841251
AM02073			0.102155
AM02220			0.163144
AM02237			0.0903159
AM02249			0.10819	up
AM02313			0.202589
AM02315			0.18201	up
AM02414			0.102588
AM02423			0.121177
AM02476			0.116823
AM02477			0.121243
AM02482			0.0920968	up
AM02500			0.0771681
AM02506			0.221983
AM02562			0.214047
AM02609			0.248385	down		up
AM02618			0.149754
AM02619			0.114261
AM02649			0.134118
AM02699	FBgn0033844	ENSG00000134255	0.0879326
AM02815			0.401629
AM02832	FBgn0002478	ENSG00000185621	0.150348
AM02846	FBgn0036662	ENSG00000169359	0.257762
AM02847			0.688997	up
AM02862	FBgn0036180	ENSG00000068308	0.484563
AM02879	FBgn0036967	ENSG00000109184	0.168409
AM03025			0.183605	up
AM03085	FBgn0039738	ENSG00000168282	0.141438
AM03091	FBgn0039357	ENSG00000144741	1.03388
AM03116			0.145091		down
AM03142	FBgn0032899		0.226346
AM03199	FBgn0031377	ENSG00000158636	0.181429
AM03254	FBgn0035787		0.104991	down
AM03290	FBgn0005658	ENSG00000151702	0.247422
AM03297			0.117514	down
AM03298	FBgn0026015	ENSG00000100038	0.255603
AM03320	FBgn0003178	ENSG00000143627	0.0913069			down
AM03333			1.39428
AM03399	FBgn0027106		0.131553
AM03417	FBgn0038477		0.118691
AM03429		ENSG00000170615	0.107149
AM03437	FBgn0032986	ENSG00000151413	0.0716654
AM03470	FBgn0024734	ENSG00000112245	0.152752
AM03488	FBgn0036844	ENSG00000164086	0.224519
AM03502	FBgn0010460		0.146303
AM03527	FBgn0037807		0.0862014
AM03609	FBgn0031611	ENSG00000112367	0.217102
AM03612	FBgn0020367	ENSG00000114573	0.0788769
AM03629	FBgn0032200		0.166872
AM03737	FBgn0038256	ENSG00000163291	0.140595
AM03742	FBgn0035318	ENSG00000101413	0.145431
AM03745		ENSG00000115665	0.122852		down
AM03779	FBgn0040521	ENSG00000196865	0.112745
AM03848		ENSG00000165102	0.0800622
AM03861		ENSG00000112394	0.171662
AM03901			0.111315
AM03993	FBgn0051664		0.259108
AM04039			0.135098
AM04047		ENSG00000061938	0.123546
AM04079	FBgn0067628	ENSG00000144559	0.287028
AM04153	FBgn0027549	ENSG00000141002	0.0634168
AM04166		ENSG00000181396	0.141726
AM04186	FBgn0004102	ENSG00000165588	0.412685
AM04192	FBgn0025885	ENSG00000105655	0.232191	up	down
AM04200			0.0838514
AM04227	FBgn0034997	ENSG00000166311	0.126952
AM04233			0.0773195
AM04234	FBgn0035622	ENSG00000077147	0.108625
AM04272	FBgn0034351	ENSG00000174173	0.132062
AM04285	FBgn0026415		0.509053
AM04312	FBgn0028399	ENSG00000111897	0.114493
AM04395	FBgn0014184	ENSG00000104904	0.0744052
AM04423	FBgn0027592	ENSG00000099917	0.596878
AM04434			0.298158			up
AM04457	FBgn0038581		0.173417		down
AM04459	FBgn0028670	ENSG00000033627	0.157257
AM04469	FBgn0036335	ENSG00000131586	0.255897
AM04586	FBgn0043044	ENSG00000145284	0.0822487
AM04600	FBgn0012037	ENSG00000159640	0.110395			up
AM04604			0.126191
AM04615	FBgn0052297	ENSG00000169371	0.122653
AM04626			0.132423
AM04704	FBgn0034614	ENSG00000165118	0.838691
AM04710	FBgn0037554	ENSG00000101751	0.200006
AM04739	FBgn0038950	ENSG00000162300	0.188827
AM04810	FBgn0039304	ENSG00000119537	0.302364
AM04851			0.127203
AM04906	FBgn0000180		0.35637
AM04908	FBgn0003231	ENSG00000161011	0.133116
AM04915	FBgn0030743	ENSG00000146066	0.161713
AM04931			0.211482
AM04975		ENSG00000198252	0.233054
AM05064	FBgn0028388	ENSG00000131236	0.11408
AM05112	FBgn0032285		0.211789		down
AM05159			0.120611
AM05193	FBgn0037720	ENSG00000185112	0.30776
AM05217	FBgn0020909	ENSG00000120158	0.0746188
AM05221		ENSG00000126838	0.1217			down
AM05298			0.161243
AM05351	FBgn0039385	ENSG00000119812	1.27019
AM05356	FBgn0012036	ENSG00000128918	0.416211
AM05367		ENSG00000134899	0.848391
AM05377			0.396449
AM05415	FBgn0039774	ENSG00000072444	0.55366
AM05426	FBgn0003065		0.337017
AM05442	FBgn0000486	ENSG00000108344	0.18071
AM05471	FBgn0029720		0.167873		down
AM05593	FBgn0036760	ENSG00000184207	0.140979
AM05638			0.301271
AM05726		ENSG00000149136	1.71364			down
AM05740	FBgn0024326	ENSG00000065559	0.143093
AM05784	FBgn0026150	ENSG00000108039	1.26913			down
AM05831	FBgn0015221		0.141997
AM05853		ENSG00000100784	0.0995721
AM05859	FBgn0011640	ENSG00000173933	0.11932
AM05872	FBgn0031186	ENSG00000136485	0.143542
AM05941	FBgn0037242	ENSG00000198060	0.0761487
AM06036	FBgn0001974	ENSG00000101654	0.119472
AM06118	FBgn0025593		0.174518
AM06126	FBgn0024941	ENSG00000182901	0.126384
AM06214	FBgn0063923		0.265022
AM06245	FBgn0033836	ENSG00000135677	0.120016
AM06280		ENSG00000148814	0.247644
AM06286	FBgn0050035		0.288636		down
AM06297	FBgn0052675	ENSG00000062716	0.127177
AM06314	FBgn0031779	ENSG00000138073	0.218342
AM06363	FBgn0034602		0.604256
AM06450		ENSG00000160188	0.242246
AM06524	FBgn0004569		0.157769
AM06535			0.202936
AM06656	FBgn0031252	ENSG00000104889	0.249509
AM06657			0.971992
AM06710			0.107229
AM06738	FBgn0035438	ENSG00000167468	0.0970703
AM06745	FBgn0004055		0.171045
AM06748			0.115849
AM06771	FBgn0024314	ENSG00000137055	0.0700285		down
AM06805	FBgn0015234	ENSG00000072310	0.0589684
AM06842	FBgn0003715		0.091626
AM06848			0.136328
AM06872	FBgn0002932		0.19656
AM07022			0.0786797	down		up
AM07032	FBgn0030608		0.203388		down
AM07118	FBgn0000635		0.189877
AM07120	FBgn0027507	ENSG00000000457	0.263569
AM07133	FBgn0029780		0.461848		down
AM07162		ENSG00000104731	0.148057
AM07220	FBgn0027554	ENSG00000144224	0.0622208
AM07235	FBgn0066365		0.221489
AM07274	FBgn0039241	ENSG00000138363	0.108726
AM07298	FBgn0061359	ENSG00000110921	0.102377
AM07311			0.149371
AM07337	FBgn0033593		0.365916
AM07348	FBgn0041585	ENSG00000182500	0.1018
AM07351			0.206676
AM07388	FBgn0031855		0.249589	up
AM07438		ENSG00000137770	0.102881
AM07486		ENSG00000143315	0.126636
AM07506	FBgn0031474		0.166911
AM07541		ENSG00000109466	0.296778
AM07547	FBgn0036262	ENSG00000100253	0.294361
AM07553		ENSG00000145794	0.596487
AM07564	FBgn0020653	ENSG00000184470	0.137937
AM07583	FBgn0050197		0.313051
AM07596	FBgn0033800	ENSG00000090054	0.104127
AM07630	FBgn0000579	ENSG00000111674	0.127901	down
AM07682			0.202378			down
AM07688	FBgn0015777		0.156801		down
AM07711			0.101105
AM07736			0.0967871
AM07781	FBgn0032879		0.200857
AM07838	FBgn0035710		0.224782
AM07846	FBgn0039003	ENSG00000109501	0.0858462
AM07912	FBgn0033392	ENSG00000111670	0.143219			down
AM07939	FBgn0021847	ENSG00000068724	0.279561
AM07967	FBgn0029685	ENSG00000127995	0.158397
AM08015			0.158553			down
AM08042	FBgn0035900	ENSG00000014164	0.126004
AM08062	FBgn0034141	ENSG00000175283	0.129684
AM08098			0.0987497
AM08113	FBgn0034647		0.448965
AM08136			0.254899
AM08171	FBgn0036354	ENSG00000164087	0.248199
AM08227	FBgn0033288	ENSG00000106536	0.633141
AM08311	FBgn0003392	ENSG00000197959	0.0785636
AM08330	FBgn0039589	ENSG00000047621	0.141961
AM08378	FBgn0003498		0.13659
AM08388	FBgn0022288	ENSG00000105447	0.180301
AM08469	FBgn0027844		0.196737	up	down
AM08533	FBgn0024891	ENSG00000066926	0.105264
AM08594			0.274016
AM08682	FBgn0010194	ENSG00000111186	0.114897	up		down
AM08747	FBgn0032949		0.0549743
AM08764	FBgn0036980	ENSG00000008853	0.164448
AM08780			0.247159
AM08805	FBgn0031590	ENSG00000104853	0.176005
AM08843	FBgn0027356		0.224908
AM08958		ENSG00000110436	0.307318
AM08968			0.305856		down
AM08969			0.388572
AM08981	FBgn0015331	ENSG00000183258	0.286964
AM08992	FBgn0032746	ENSG00000143183	0.165728
AM09003	FBgn0029896		0.300064
AM09048	FBgn0003943	ENSG00000150991	0.150917			down
AM09086	FBgn0033188		0.47192	up	down
AM09197	FBgn0027570		0.202711			down
AM09260			0.257507
AM09271	FBgn0039805		0.321762
AM09276			0.136352
AM09302	FBgn0024315		0.158273
AM09328	FBgn0053147	ENSG00000175818	0.104849
AM09333			0.241506
AM09380			0.247677
AM09388	FBgn0026238	ENSG00000175093	0.147695
AM09456	FBgn0039159	ENSG00000062582	0.106479
AM09467	FBgn0039561	ENSG00000147454	0.437593
AM09536		ENSG00000163106	0.20402
AM09617	FBgn0037647	ENSG00000155876	0.123231
AM09698	FBgn0031224	ENSG00000185272	0.256166
AM09749		ENSG00000166311	0.115163
AM09751	FBgn0031968		0.258882
AM09759			0.193288
AM09760		ENSG00000123643	0.103762
AM09813	FBgn0039635	ENSG00000168291	0.122896
AM09829		ENSG00000174343	0.350655
AM09863		ENSG00000133805	0.126673
AM09931			0.156755
AM10000	FBgn0038192	ENSG00000121067	0.100243
AM10022	FBgn0038088	ENSG00000152611	0.324626
AM10055	FBgn0039668	ENSG00000170881	0.220139
AM10071			0.146479
AM10109			1.51756
AM10110	FBgn0036911	ENSG00000172500	0.318606
AM10191	FBgn0004652		0.0991847
AM10259	FBgn0027495	ENSG00000186532	0.171238
AM10285	FBgn0028468	ENSG00000109736	0.160382
AM10358	FBgn0020545		0.0809319
AM10365			0.11356
AM10402	FBgn0000473		0.156984
AM10433	FBgn0030327	ENSG00000033170	0.161462
AM10534		ENSG00000078902	0.235737
AM10564	FBgn0004514	ENSG00000135312	0.124901	up
AM10579	FBgn0032515		0.187075
AM10591			0.316255
AM10608	FBgn0033551	ENSG00000121644	0.232038
AM10649	FBgn0034184	ENSG00000100364	0.0912233	down
AM10652			0.294868
AM10668	FBgn0038168	ENSG00000185085	0.222591
AM10679	FBgn0036182	ENSG00000085662	0.244633	up
AM10706	FBgn0004889	ENSG00000175470	0.212568
AM10865			0.252369
AM10874			0.153258
AM10880	FBgn0039223	ENSG00000160785	0.0909091
AM10888			0.662302			up
AM10890	FBgn0038524	ENSG00000157593	0.091495
AM10919			0.112725
AM10946	FBgn0019949	ENSG00000136807	0.183034	up
AM10959	FBgn0023524		0.555805
AM11076			0.25837	up
AM11164			0.140916	up
AM11193	FBgn0033196	ENSG00000119686	0.135618
AM11199	FBgn0034535	ENSG00000184903	0.166171
AM11202			0.297162
AM11207	FBgn0026565	ENSG00000130707	0.581922
AM11248	FBgn0033059	ENSG00000133316	0.696107
AM11263	FBgn0016123		0.246858
AM11280			0.142284
AM11290	FBgn0028671		0.220551
AM11310	FBgn0036509	ENSG00000129636	0.09038
AM11311	FBgn0038381	ENSG00000111405	0.291285
AM11315	FBgn0004176	ENSG00000037042	0.332402
AM11345	FBgn0040222	ENSG00000107105	0.208486
AM11372	FBgn0003380		0.139161
AM11398			0.194615
AM11403	FBgn0039876	ENSG00000050130	0.0783084
AM11421	FBgn0032456	ENSG00000001626	0.270096
AM11505	FBgn0041184	ENSG00000171150	0.0962391
AM11594	FBgn0003317	ENSG00000115170	0.115095
AM11611			0.151013	up
AM11623	FBgn0032864	ENSG00000137509	0.0966066
AM11647	FBgn0031384	ENSG00000119682	0.115998
AM11668		ENSG00000110911	0.193109
AM11725	FBgn0005671	ENSG00000116039	0.115231
AM11784			0.0857005
AM11795	FBgn0035057	ENSG00000186193	0.27242
AM11829	FBgn0025790		0.125901
AM11842	FBgn0034246		0.150847
AM11863	FBgn0034286		0.242443
AM11865	FBgn0037299	ENSG00000139722	0.176432
AM11896	FBgn0031150		0.100115
AM11916			0.187425		down	up
AM11923	FBgn0025571	ENSG00000168066	0.226721	up
AM11925	FBgn0039915	ENSG00000131389	0.148428
AM11936	FBgn0033309	ENSG00000144320	0.55753
AM11944	FBgn0050148		0.158986
AM11995	FBgn0015623	ENSG00000127948	0.254366
AM12057			0.150316		down
AM12096	FBgn0033413	ENSG00000119838	0.146615
AM12135	FBgn0028984		0.29526
AM12195	FBgn0038237	ENSG00000128655	0.500572
AM12242	FBgn0019932	ENSG00000123505	0.0956391
AM12271	FBgn0001942		0.0800377
AM12292	FBgn0022355		0.115879
AM12297		ENSG00000100258	0.113206
AM12313			0.330072
AM12347	FBgn0058470		0.229232			down
AM12420	FBgn0000171	ENSG00000067048	0.0851162		down
AM12427		ENSG00000166446	0.202278
AM12441		ENSG00000115290	0.195881
AM12507	FBgn0030752	ENSG00000112697	0.0819353
AM12513	FBgn0039844		0.203828	up
AM12514			0.242936
AM12518			0.654352
AM12520	FBgn0039402	ENSG00000130724	0.130845
AM12533			0.165741
AM12535	FBgn0034162		0.154473
AM12542			0.155514	up		down
AM12568	FBgn0013973	ENSG00000061918	0.21011
AM12602	FBgn0002921	ENSG00000075673	0.0852637	up		up
AM12743	FBgn0003660	ENSG00000179036	0.366608
AM12756			0.590167
AM12783		ENSG00000177697	0.20878
AM12798	FBgn0040378		1.24554
AM12801	FBgn0029506		0.186931
AM12808	FBgn0027865	ENSG00000085117	0.120074
AM12828			0.192224
AM12833R			0.382413
AM12845R			0.272758
AM12846			0.0956273
AM12859			0.220022
AM12864			0.13645
AM12870R			0.122277
AM12878			0.391546
AM12884			0.199214
AM12884R			0.279301			up
AM12899			0.431613
AM12900R			0.34612
